# Supplementary material for: Discovery and optimisation of a covalent ligand for TRIM25 and its application to targeted protein ubiquitination
Source: Chem Sci. 2025 May 12;16(23):10432–43. doi: 10.1039/d5sc01540e (PMC12067093; doi:10.1039/d5sc01540e)
Supplement: SC-016-D5SC01540E-s001 [file SC-016-D5SC01540E-s001.xlsx]

## Sheet: 221 ClAc library
Manuscript Compound Number	SMILES	Enamine Catalogue ID	SMILES (salts removed)	Enamine Catalogue ID (salts removed)
1	ClCC(=O)N1CCCN(CC1)C(=O)c1ccc(Cl)cc1	Z1562129258
2	CCN1C(=O)C2CN(CCN2C1=O)C(=O)CCl	Z1562147268
3	NC(=O)C1CCCCN1C(=O)CCl	Z147647664
4	NC(=O)C1CCCN(C1)C(=O)CCl	Z147647666
5	CC(N(C)C(=O)CCl)c1ccccc1	Z86023354
6	ClCC(=O)N1CCOC(CCc2ccccc2)C1	Z3766266332
7	Cc1ccccc1OCC(=O)N1CCN(CC1)C(=O)CCl	Z1562139518
8	ClCC(=O)N1CCN2C(CCC2=O)C1	Z1551857669
	ClCC(=O)N1CCc2ncncc2C1	Z2863946660
	ClCC(=O)N[C@H]1C[C@H](C1)n1cccn1	Z4631730921
	Cc1ccc(cc1)C(=O)NCCNC(=O)CCl	Z644776932
	CN1c2ccccc2C(CS1(=O)=O)NC(=O)CCl	Z3766262724
	OC1CN(CCc2ccccc12)C(=O)CCl	Z3788967111
	CN(CCC(O)c1ccc(Br)cc1)C(=O)CCl	Z4527731532
	ClCC(=O)N1CCOC2(CCC2)CC1	Z3073542106
	Cc1conc1C1CN(C1)C(=O)CCl	Z3766268825
	CN1C(=O)c2ccc(NC(=O)CCl)cc2C1=O	Z147647196
	CN(C)S(=O)(=O)c1ccccc1CNC(=O)CCl	Z258588408
	CC1CCCCC1NC(=O)CCl	Z56853743
	ClCC(=O)N1CCC(CC1)c1nc2ccccc2o1	Z57980312
	NS(=O)(=O)c1ccc(Cl)c(NC(=O)CCl)c1	Z445406220
	ClCC(=O)N(Cc1ccsc1)C1CC1	Z756930208
	Cc1nnc([nH]1)-c1ccc(C)cc1NC(=O)CCl	Z1416063849
	ClCC(=O)N1CCC(C1)c1ccn[nH]1	Z3766265762
	CC(NC(=O)CCl)c1noc(Cc2ccccc2)n1	Z1562147278
	Cc1ccc2nnc(CNC(=O)CCl)n2c1	Z3766268582
	Cc1ccc(CC(CO)CNC(=O)CCl)cc1	Z3766270656
	Fc1ccccc1Oc1cc(CNC(=O)CCl)ccn1	Z4618317161
	CC1CCc2onc(CNC(=O)CCl)c2C1	Z4426433693
	Fc1ccccc1COC1CCN(CC1)C(=O)CCl	Z3766265429
	Cc1c(C)n(Cc2ccco2)c(NC(=O)CCl)c1C#N	Z85936202
	ClCC(=O)NCc1ccc2OCOc2c1	Z56889407
	COc1cccc(CN(C)C(=O)CCl)c1	Z57057722
	Cc1noc(C)c1CNC(=O)CCl	Z1138459452
	ClCC(=O)N1CCCC1=O	Z56900890
	CC1Cc2ccccc2N1C(=O)CCl	Z56869453
	CC(NC(=O)CCl)c1cccc(Cl)c1	Z56347161
	ClCC(=O)N1CCOCCC1c1ccccc1	Z3493377852
	Oc1cccc(CC2CCCN(C2)C(=O)CCl)c1	Z4527731554
	CC(Cc1cc(C)[nH]n1)NC(=O)CCl	Z1562149874
	CC(=O)C1CCCCN1C(=O)CCl	Z3766263246
	Cc1cccc(c1)N1CCC(NC(=O)CCl)C1=O	Z3217399408
	ClCC(=O)N1CCN(CC1)c1nc2ccccc2o1	Z1562143164
	Oc1cnn2CCN(Cc12)C(=O)CCl	Z4632534085
	Cn1nccc1CC1CCN(C1)C(=O)CCl	Z4447313093
	ClCC(=O)Nc1cccc(c1)C#C	Z316107652
	ClCC(=O)NCCc1cccc2ccccc12	Z561553450
	ClCC(=O)NC1CCOc2ccccc12	Z89284917
	ClCC(=O)Nc1cccc(Cl)c1	Z56869410
	ClCC(=O)NC1(CCCC1)C#N	Z56346983
	ClCC(=O)NCCC1=CCCCC1	Z56887749
	CC1CN(CC(C)O1)c1ccc(NC(=O)CCl)cc1	Z945125718
	ClCC(=O)NC1(CCC1)c1ncccn1	Z4622579291
	ClCC(=O)N1CCC[C@@H]1c1nc[nH]n1	Z3766262997
	Cc1n[nH]c2CCN(Cc12)C(=O)CCl	Z4108300757
	Fc1ccc(cc1)S(=O)(=O)C1CCN(CC1)C(=O)CCl	Z3433759316
	Cc1ccc(C)c(Oc2ccc(CNC(=O)CCl)cn2)c1	Z4607562147
	Cc1ccn2cc(CNC(=O)CCl)nc2c1	Z4607597275
	ClCC(=O)N1CCC(CC1)n1nc2ccccc2n1	Z4607562000
	Cn1nccc1N1CCCC(NC(=O)CCl)C1=O	Z3217399858
	CC1(CCS(=O)(=O)C1)NC(=O)CCl	Z56347342
	CN(C)C(=O)c1ccc(CNC(=O)CCl)cc1	Z561373056
	ClCC(=O)NCc1ccc(cc1)C#N	Z381548296
	FC(F)(F)C1CCC(CC1)NC(=O)CCl	Z258588862
	ClCC(=O)N(C1CCCC1)C1CCS(=O)(=O)C1	Z90662869
	Oc1nc2CCCCc2cc1CNC(=O)CCl	Z4607562123
	ClCC(=O)N1CCCCCC1c1ncon1	Z3766261126
	ClCC(=O)NC(Cn1ccccc1=O)c1ccccc1	Z3766271587
	ClCC(=O)NCCC1COCCO1	Z3082224643
	ClCC(=O)N1CCC(Cc2nccs2)C1	Z4618452700
	ClCC(=O)NC1CCS(=O)(=O)c2ccccc12	Z1562121972
	ClCC(=O)NCCCc1cnccn1	Z1562150588
	ClCC(=O)Nc1cc(Cl)ccc1-n1cncn1	Z57040453
	Cc1c(NC(=O)CCl)c(=O)n(-c2ccccc2)n1C	Z56753979
	ClCC(=O)N1CCc2[nH]c3ccccc3c2C1	Z258606508
	COc1ccc(Cl)cc1NC(=O)CCl	Z56896294
	ClCC(=O)N1CCCC2CCCCC12	Z147647782
	CN(C1CCCCC1)C(=O)CCl	Z56891381
	ClCC(=O)N1CCC(=CC1)c1c[nH]c2ccccc12	Z258606284
	Cc1nc(CNC(=O)CCl)c2ccccn12	Z4622579356
	ClCC(=O)N1CCN(CC1)C(=O)Nc1ccccc1	Z147652456
	Cc1cccc2nc(CCNC(=O)CCl)cn12	Z4188247783
	Fc1ccc2c(noc2c1)C1CCN(CC1)C(=O)CCl	Z3766263827
	ClCC(=O)N1CCCC(C1)c1ncc[nH]1	Z4608959384
	OC(C1CCN(CC1)C(=O)CCl)c1ccc(F)cc1	Z1562142808
	ClCC(N1CCN2C=NC=C2C1)=O	Z4670552260
	COc1cccc(c1)C1CCCN1C(=O)CCl	Z561256184
	CC(NC(=O)CCl)c1cccc2ccccc12	Z147651784
	Cc1nc(NC(=O)CCl)sc1C	Z56871624
	ClCC(=O)Nc1cc(Cl)ccc1C#N	Z56889402
	ClCC(=O)NC(C1CC1)C1CC1	Z258588314
	COCC[C@@H](NC(=O)CCl)c1ccccc1	Z4527731482
	Cl.Cc1cnn2CCN(Cc12)C(=O)CCl	Z4607562204	Cc1cnn2CCN(Cc12)C(=O)CCl	BBV-397884254
	Fc1ccc(NC(=O)CN2CCN(CC2)C(=O)CCl)cc1	Z147647866
	CS(=O)(=O)N1CCCN(CC1)C(=O)CCl	Z1562122122
	ClCC(N(C1C2=CC=C(Cl)C=C2)CCC3=C1NC=N3)=O	Z3766262081
	CCC1N(CCc2sccc12)C(=O)CCl	Z199424104
	ClCC(=O)NCC1CCCO1	Z56862634
	ClCC(=O)NCc1cccc(c1)N1CCCC1=O	Z561727034
	ClCC(=O)Nc1cccc(NC(=O)c2ccccc2)c1	Z567116784
	ClCC(=O)NCC1CCC1	Z411906316
	OC(=O)c1ccc(Cl)cc1NC(=O)CCl	Z56910423
	C[C@H]1CN(CCN1C(=O)c1cnn(C)c1)C(=O)CCl	Z4608958940
	ClCC(=O)N1CCN(CC1)C(=O)N1CCCCC1	Z258606556
	ClCC(=O)N1CCCCC11CCOCC1	Z3072692879
	CC(O)CC1CCN(CC1)C(=O)CCl	Z3766271290
	Cn1nc2CCCCc2c1CNC(=O)CCl	Z4622591519
	ClCC(=O)N[C@H]1CCS(=O)(=O)c2ccccc12	Z4527731518
	Cc1ccc(cc1)N1CCC(NC(=O)CCl)C1=O	Z1562144202
	ClCC(=O)NCC(=O)N1CCCC1	Z258588558
	CCC(NC(=O)CCl)c1ccc(Cl)cc1	Z258588390
	Fc1ccc(NC(=O)CCl)c(Cl)c1	Z56896193
	FC1(F)Oc2ccc(NC(=O)CCl)cc2O1	Z56915980
	FC(F)(F)c1ccccc1NC(=O)CCl	Z56896251
	CN(C)C1(CNC(=O)CCl)CCCCC1	Z57044257
	COc1cc(Cl)c(C)cc1NC(=O)CCl	Z56896263
	Cn1cc(CN(Cc2ccc(Cl)cc2)C(=O)CCl)cn1	EN300-37104447
	Cc1cnc2[nH]cc(CCNC(=O)CCl)c2c1	Z3217401302
	Cc1cccn2cc(CCNC(=O)CCl)nc12	Z4605013802
	Cn1cnc2cc(CNC(=O)CCl)ccc12	Z4605013814
	OC[C@H]1CC[C@H](CC1)NC(=O)CCl	Z2596883775
	Cc1ncsc1CNC(=O)CCl	Z4607562196
	CC(NC(=O)CCl)c1ccc2[nH]ncc2c1	Z3766268912
	ClCC(=O)N1CCC(CC1)C(=O)N1CCCCCC1	Z291278928
	ClCC(=O)Nc1c(cnn1-c1ccccc1)C#N	Z353720732
	ClCC(=O)Nc1cccc(c1)C(=O)N1CCSCC1	Z959250156
	ClCC(=O)Nc1cccc2ncccc12	Z212044048
	FC(F)(F)Cc1nnc(NC(=O)CCl)o1	Z1021388618
	ClCC(=O)Nc1ccc(cc1)N1CCCC1=O	Z147651952
	ClCC(=O)Nc1cc2OCCCOc2cc1Cl	Z199423776
	Cn1c(CNC(=O)CCl)nc2cccnc12	Z4631730919
	Fc1cccc(NC(=O)CN2CCN(CC2)C(=O)CCl)c1	Z147647796
	Cc1cccc(NC(=O)[C@@H]2CCCN2C(=O)CCl)n1	Z1562141584
	ClCC(=O)N1CCC(CC1)C(=O)N1CCCC1	Z561078536
	Cn1ncc2C(CCCc12)NC(=O)CCl	Z4618317271
	ClCC(=O)N1CCN(CC1)c1ccccc1C#N	Z1562134936
	Cn1ncc2CCC(Cc12)NC(=O)CCl	Z4605601053
	ClCC(=O)N1CCCCCCC1	Z147647332
	ClCC(=O)NC1CCCCNC1=O	Z374049348
	Cc1cc(NC(=O)CCl)no1	Z56883164
	Fc1ccc(CCNC(=O)CCl)cc1	Z56822826
	ClCC(=O)NC1(CCCC1)c1ccc2OCCOc2c1	Z168796170
	Cc1cccc(N(CCC#N)C(=O)CCl)c1C	Z561092804
	CCN(Cc1ccc(cc1F)C#N)C(=O)CCl	Z561826190
	CC(NC(=O)CCl)c1cc2CCCCn2n1	Z4622579256
	COCC1C=CCCN1C(=O)CCl	Z4119645010
	Cc1ncsc1CCNC(=O)CCl	Z2238012984
	CCc1c[nH]c(CNC(=O)CCl)n1	Z4605013812
	CS(=O)(=O)c1ccc(CNC(=O)CCl)cc1	Z561690358
	NC(=O)C(Cc1ccccc1)NC(=O)CCl	Z1562130066
	CN(Cc1nc2ccccc2[nH]1)C(=O)CCl	Z4629310706
	ClCC(=O)Nc1cc2OCCOc2cc1Cl	Z199423338
	ClCC(=O)NC1CCC2(CC1)OCCO2	Z291278632
	Cc1ccc(cc1C)N(CCC#N)C(=O)CCl	Z199424084
	Cl.ClCC(=O)NCCN1CCc2ccccc12	Z3377867516	ClCC(=O)NCCN1CCc2ccccc12	Z561538902
	CC(C)n1nccc1NC(=O)CCl	Z56347133
	ClCC(=O)Nc1nc(cs1)-c1cccs1	Z561231266
	ClCC(=O)N1CCc2sccc2C1	Z227825832
	ClCC(=O)N1CC(C1)c1ccc(Br)cn1	Z4607562075
	Cc1cccnc1NC(=O)C1CCN(CC1)C(=O)CCl	Z4605311423
	CN(CCc1ncc(Br)cn1)C(=O)CCl	Z4618317068
	ClCC(=O)N1CC2(C1)CCOCC2	Z3217399684
	ClCC(=O)NCc1noc(n1)C1CC1	Z3217399611
	Cc1cc(nn1C)C1CCCN1C(=O)CCl	Z4622591433
	Cc1cccc(c1)C(CNC(=O)CCl)N1CCOCC1	Z4611329315
	ClCC(=O)NC1CCN(CC1)C(=O)C1CCCCC1	Z291278676
	CN(C(=O)CCl)c1nc2ccccc2s1	Z561260694
	CC1CN(CC(C)O1)C(=O)CCl	Z56862618
	CCN(C1CCS(=O)(=O)C1)C(=O)CCl	Z56915887
	CC(NC(=O)CCl)c1cccs1	Z57044219
	COc1ccc(C2CCCN2C(=O)CCl)c(OC)c1	Z561045400
	ClCC(=O)NCc1ccc(nc1)N1CCOCC1	Z258588510
	OCC(F)=C1CCN(C1)C(=O)CCl	Z4527731398
	Cc1cc(no1)C(=O)NC1CCN(CC1)C(=O)CCl	Z1562129754
	CC(NC(=O)CCl)c1cnn(c1)C1CC1	Z3211945928
	Cc1nc(CN2CCCN(CC2)C(=O)CCl)no1	Z4608958972
	Cc1ccccc1C1(CNC(=O)CCl)CCOCC1	Z1562129358
	Cc1noc(n1)N1CCN(CC1)C(=O)CCl	Z4607562127
	CCN(C1CCCCC1)C(=O)CCl	Z56891379
	Cc1nc(cs1)-c1cccc(NC(=O)CCl)c1	Z57984668
	Cc1oc(NC(=O)CCl)c2c1c(C)n[nH]c2=O	Z85921951
	CC1CCCCN1C(=O)CCl	Z56853744
	C[C@H](NC(=O)CCl)c1cccc2cnccc12	Z3766270932
	OC1CCC2(CC1)CCN(CC2)C(=O)CCl	Z2596886970
	ClCC(=O)N1CCOC2(CCC2)C1	Z2596884103
	Cc1ccc(CN(CCO)C(=O)CCl)cc1	Z3766270238
	Cc1ccc(CNC(=O)CCl)nc1C	Z4618317402
	Cn1nccc1C(NC(=O)CCl)c1ccccc1	Z4607562176
	Cc1nc(CC2CCN(CC2)C(=O)CCl)no1	Z2903924360
	ClCC(=O)N1CCCC1c1ccsc1	Z561606520
	ClCC(=O)NCC1(CC1)c1ccccc1	Z258588668
	Cc1ccc(C)c(NC(=O)CCl)c1	Z56867229
	Fc1cc(NC(=O)CCl)ccc1Cl	Z445401080
	Fc1ccc(NC(=O)CCl)c(F)c1	Z56896319
	CCCn1nccc1NC(=O)CCl	Z561109586
	Fc1cnc(CCNC(=O)CCl)c(F)c1	Z4629254237
	CNC(=O)C1(CCCCC1)NC(=O)CCl	Z567138138
	Fc1cc(CNC(=O)CCl)ccc1N1CCOCC1	Z562062892
	ClCC(=O)N1CC(C1)n1ccnn1	Z2596884422
	C\C(=C/CNC(=O)CCl)c1cnn(C)c1	Z4622591435
	ClCC(=O)N1CCC[C@@H]1c1ccon1	Z3766270771
	Fc1cccc(CNC(=O)CCl)c1	Z362629546
	CNC(=O)Cn1cc(NC(=O)CCl)cn1	Z567123426
	Cc1cccc(C)c1NC(=O)CCl	Z56969355
	CNC(=O)C1CCN(CC1)C(=O)CCl	Z432031224
	CN(Cc1ccccc1C)C(=O)CCl	Z57051069
	CS(=O)(=O)c1ccc(NC(=O)CCl)cc1	Z199423514
	ClCC(=O)NCCc1ccc2OCCOc2c1	Z147648024
	CC(NC(=O)CCl)c1csc(n1)-c1ccccc1	Z4607562117
	Cc1nnc(C(NC(=O)CCl)c2ccccc2)n1C	Z1562136556
	Oc1cccc2CN(Cc12)C(=O)CCl	Z2697228391
	ClCC(=O)N1CCOCC1C1CC1	Z1542914373
	C[C@@H](NC(=O)CCl)c1cccc(c1)C#N	Z3859932615
	OC1(Cc2ccc(F)cc2)CCN(C1)C(=O)CCl	Z4527731546
	Cc1ccc(CC(NC(=O)CCl)c2ccccn2)cc1	Z4607562182
	CC(C)CN(C1CC1)C(=O)CCl	Z561310518
	CN(C)C(=O)c1ccc(NC(=O)CCl)cc1	Z56979396
	Cc1cc(NC(=O)CCl)n(n1)-c1ccccc1	Z55993038
	COc1ccc(CN(C)C(=O)CCl)cc1	Z90122554
	COc1ccccc1C(C)NC(=O)CCl	Z85921033
	ClCC(=O)N(C1CC1)C1=CCCCC1	Z85936387
